# Supplementary material for: Clonal competition within complex evolutionary hierarchies shapes AML over time
Source: PubMed Central journal article supplement (PMC7002407; doi:10.1038/s41467-019-14106-0), 2020-02-05
Supplement: 41467_2019_14106_MOESM2_ESM.pdf [file 41467_2019_14106_MOESM2_ESM.pdf]

**Supplementary Information**

**Clonal competition within complex evolutionary hierarchies shapes AML over time**

Sandén et al.

# Supplementary Figures

**a**

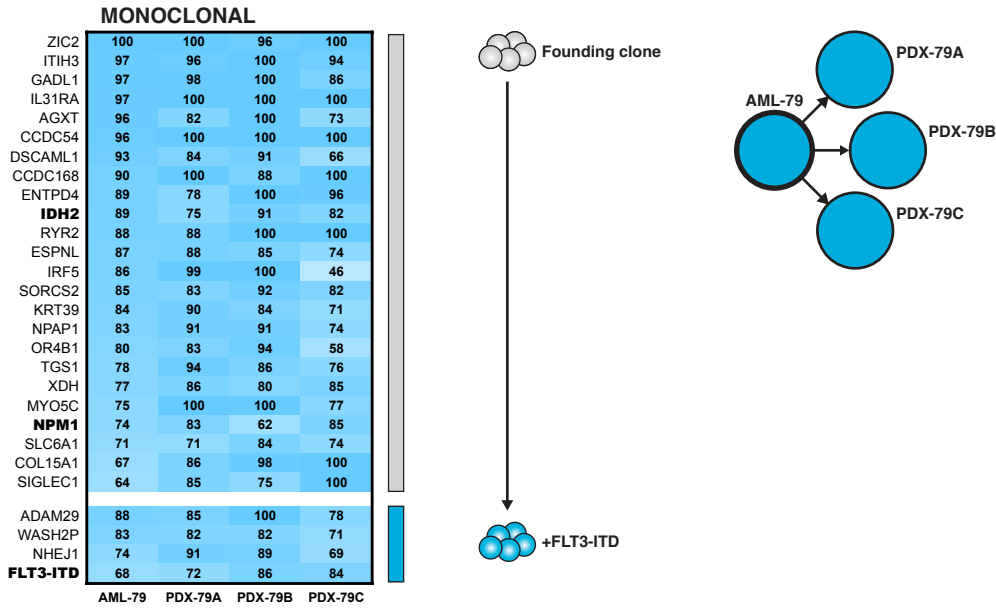

**b**

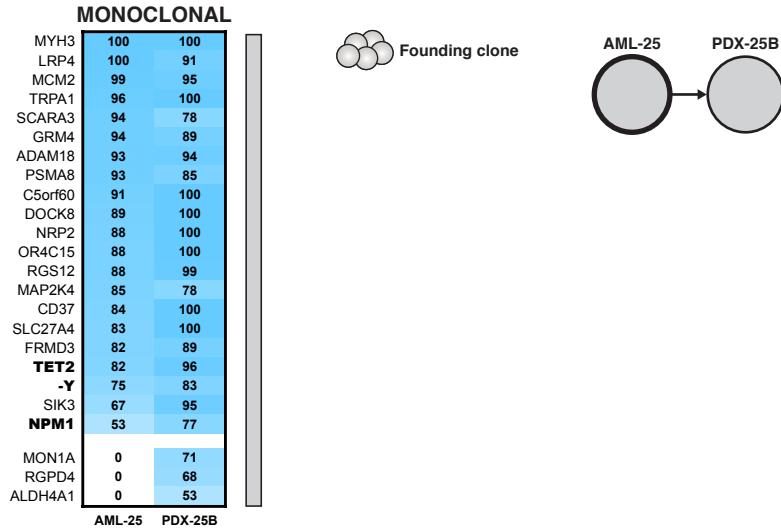

**c**

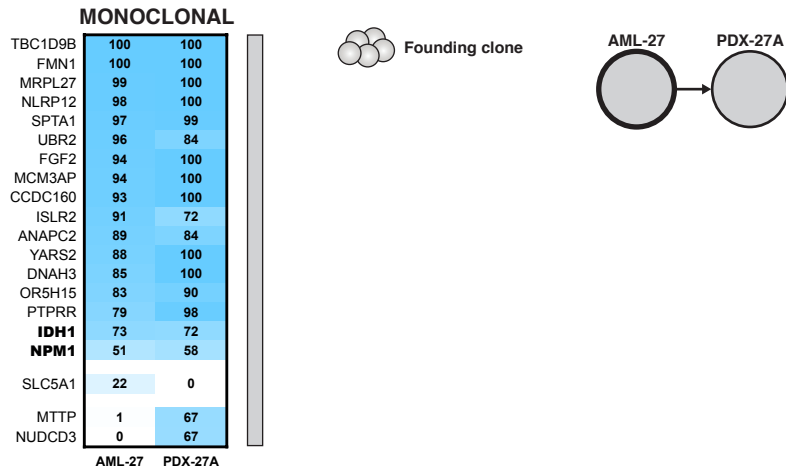

**d**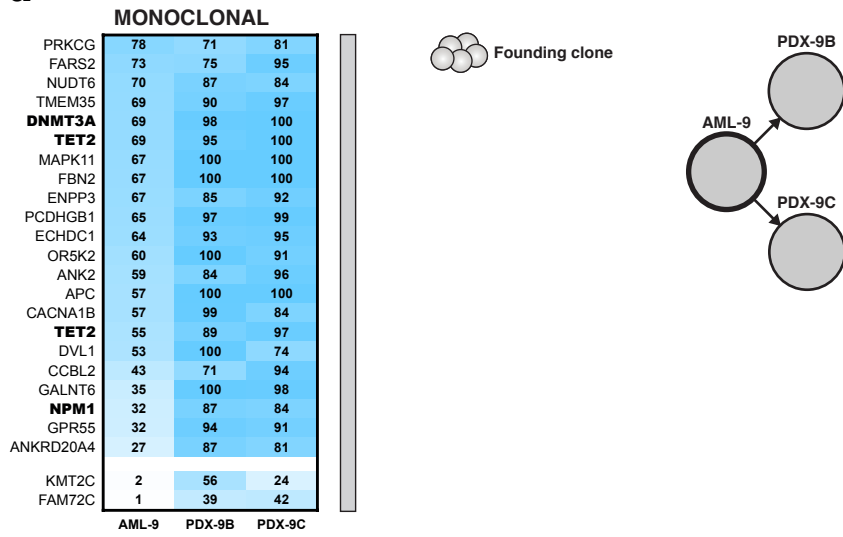

**Supplementary Figure 1. Additional xenografts with the Monoclonal pattern.** (a-d) Four additional cases with the Monoclonal pattern of clonal dynamics.

**a**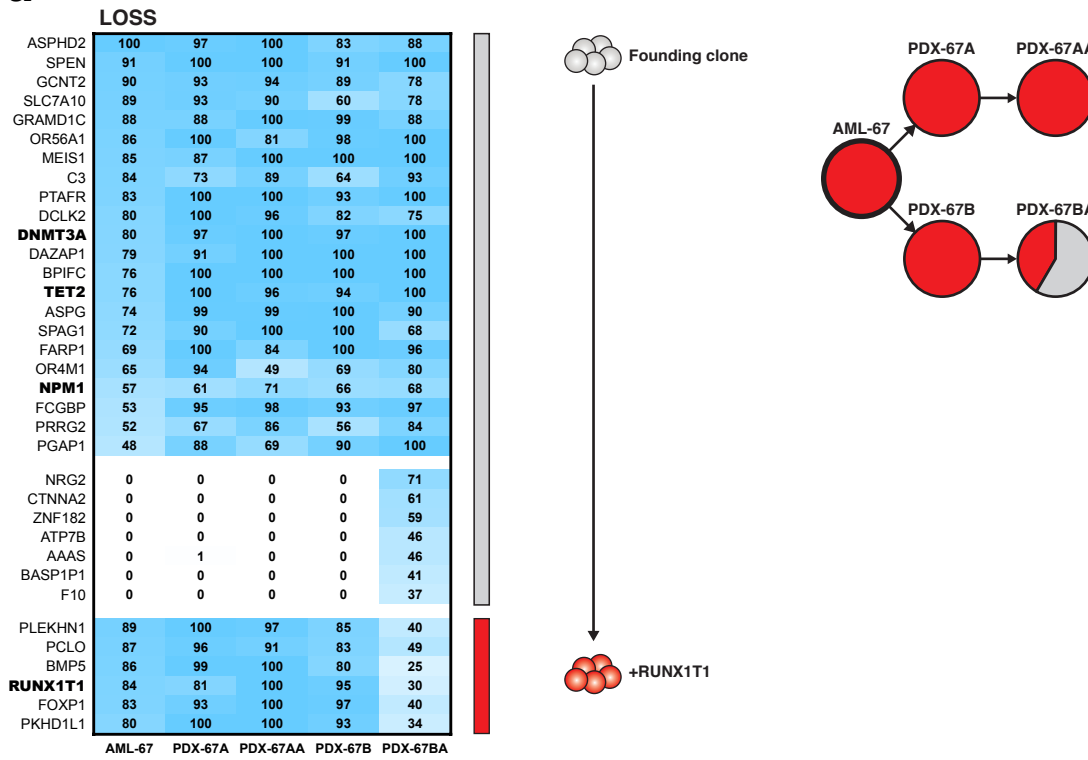**b**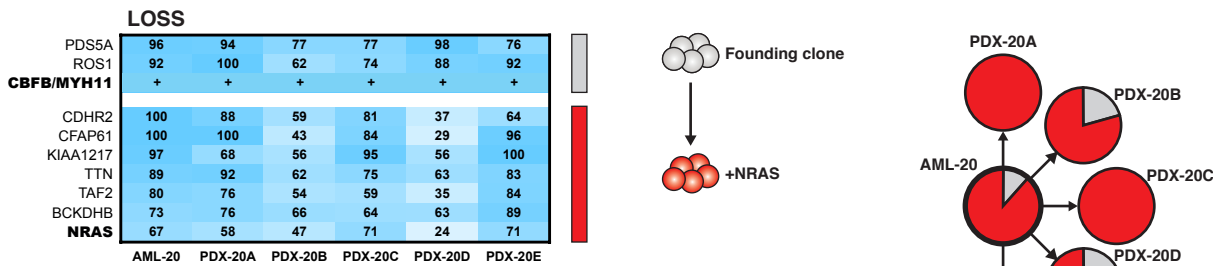**c**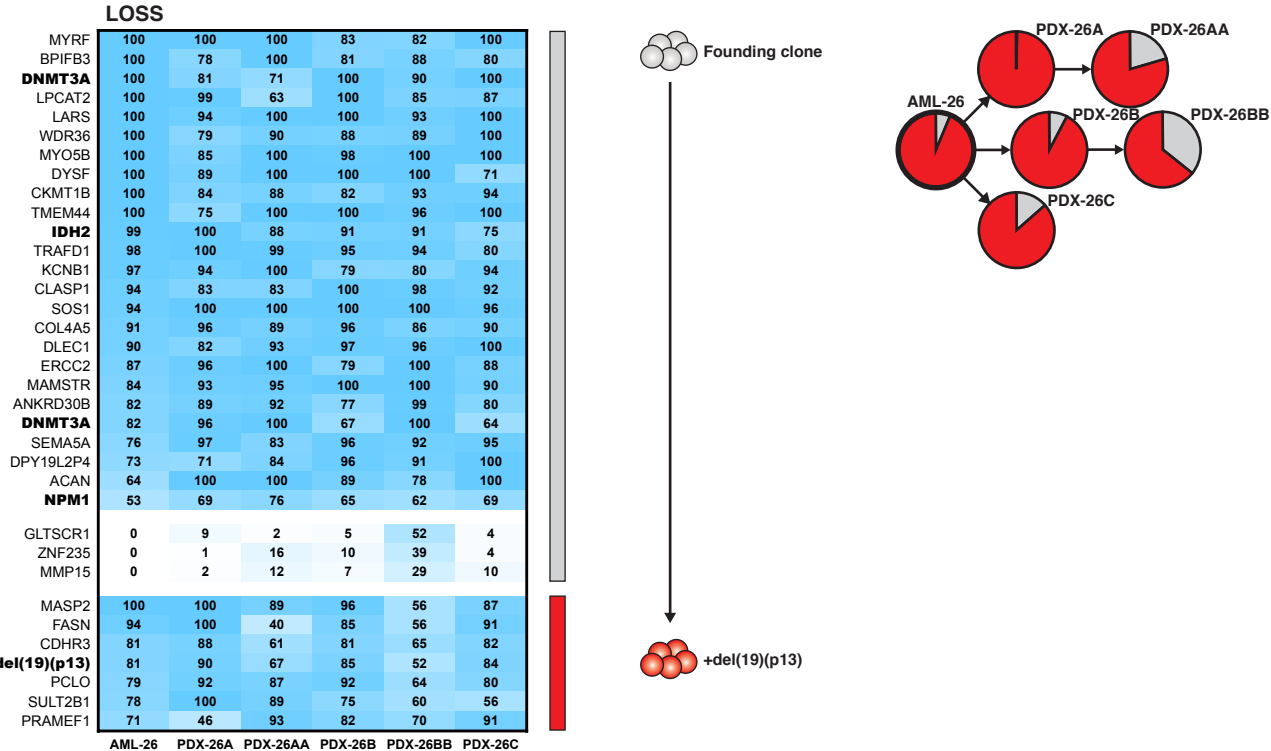

**Supplementary Figure 2. Additional xenografts with the Loss pattern. (a-c) Three additional cases with the Loss pattern of clonal dynamics.**

**a**

**EXPANSION**

|                       |     |     |     |     |     |
|-----------------------|-----|-----|-----|-----|-----|
| THADA                 | 100 | 100 | 100 | 100 | 100 |
| MYT1L                 | 100 | 88  | 78  | 100 | 100 |
| <b>FLT3</b>           | 98  | 85  | 100 | 93  | 100 |
| <b>STAG2</b>          | 93  | 100 | 100 | 100 | 100 |
| GGT8P                 | 92  | 78  | 88  | 100 | 90  |
| IGSF9B                | 92  | 100 | 90  | 84  | 74  |
| <b>TET2</b>           | 86  | 100 | 93  | 100 | 100 |
| EVPL                  | 85  | 100 | 92  | 100 | 83  |
| MYO3A                 | 85  | 100 | 91  | 70  | 97  |
| ABC4                  | 80  | 100 | 100 | 79  | 100 |
| ZFYVE9                | 79  | 61  | 60  | 83  | 97  |
| NRP2                  | 67  | 80  | 85  | 100 | 78  |
| WDR17                 | 58  | 100 | 98  | 99  | 100 |
| HMCN2                 | 58  | 94  | 94  | 85  | 88  |
| <b>NPM1</b>           | 47  | 47  | 62  | 57  | 63  |
| MANF                  | 21  | 61  | 100 | 98  | 78  |
| <b>LOH(4)(q21-35)</b> | 0   | 94  | 92  | 100 | 100 |
| PCDHB7                | 0   | 0   | 10  | 77  | 15  |
| <b>del(2)(q36)</b>    | 0   | 0   | 0   | 0   | 89  |
| SCRN1                 | 0   | 0   | 0   | 74  | 7   |
| <b>ATRX</b>           | 0   | 0   | 0   | 72  | 1   |

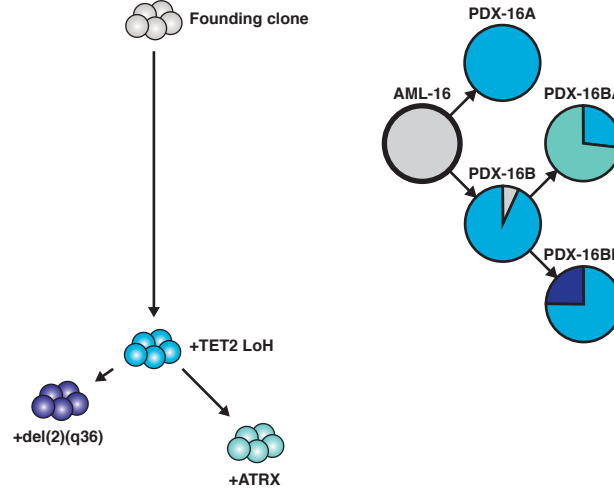**b**

**EXPANSION**

|               |     |     |     |     |
|---------------|-----|-----|-----|-----|
| PCDH11Y       | 86  | 100 | 100 | 100 |
| ACOT1         | 73  | 83  | 97  | 100 |
| LOC101928697  | 100 | 74  | 100 | 100 |
| WBSCR17       | 100 | 83  | 100 | 100 |
| PSMB7         | 100 | 71  | 90  | 85  |
| ADGRV1        | 96  | 99  | 94  | 74  |
| MMP16         | 96  | 45  | 52  | 89  |
| MEGF10        | 95  | 91  | 95  | 100 |
| <b>DNMT3A</b> | 92  | 100 | 96  | 81  |
| KIAA0226      | 91  | 97  | 96  | 99  |
| FLT3          | 89  | 100 | 100 | 84  |
| ZNF366        | 89  | 79  | 89  | 90  |
| DSC3          | 89  | 85  | 99  | 89  |
| HMCN1         | 85  | 90  | 100 | 95  |
| PEPD          | 82  | 85  | 100 | 100 |
| PEX16         | 81  | 85  | 94  | 100 |
| AKAP13        | 79  | 85  | 63  | 92  |
| SPTA1         | 76  | 69  | 100 | 100 |
| EPHA7         | 73  | 99  | 97  | 83  |
| DNAH3         | 73  | 100 | 100 | 100 |
| PATL1         | 70  | 89  | 92  | 100 |
| <b>GATA2</b>  | 59  | 64  | 72  | 100 |
| NMUR2         | 51  | 80  | 74  | 99  |
| <b>NPM1</b>   | 50  | 58  | 74  | 80  |
| KRT28         | 49  | 63  | 100 | 90  |
| KIAA0922      | 87  | 38  | 1   | 0   |
| <b>NRAS</b>   | 82  | 30  | 0   | 0   |
| KIF2B         | 74  | 27  | 0   | 0   |
| <b>WT1</b>    | 0   | 52  | 88  | 100 |
| WDR62         | 1   | 50  | 87  | 99  |
| CCT6B         | 0   | 0   | 100 | 2   |
| PAPPA         | 0   | 0   | 89  | 0   |
| PDE2A         | 0   | 0   | 3   | 96  |

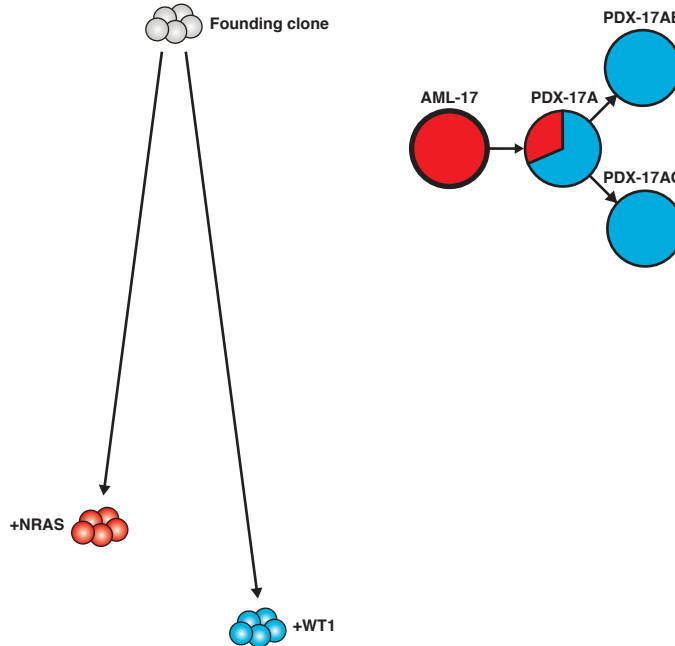**c**

**EXPANSION**

|                        |     |     |     |     |     |     |     |     |     |     |
|------------------------|-----|-----|-----|-----|-----|-----|-----|-----|-----|-----|
| EDAR                   | 100 | 94  | 100 | 91  | 100 | 92  | 62  | 85  | 92  | 74  |
| ANXA2P2                | 100 | 91  | 89  | 100 | 100 | 100 | 100 | 98  | 95  | 89  |
| TTN                    | 100 | 100 | 90  | 92  | 86  | 99  | 95  | 100 | 89  | 94  |
| TUBB3                  | 90  | 94  | 96  | 79  | 99  | 100 | 100 | 100 | 100 | 100 |
| <b>STAG2</b>           | 89  | 97  | 89  | 95  | 100 | 100 | 94  | 98  | 99  | 98  |
| SH2B3                  | 87  | 100 | 86  | 97  | 93  | 99  | 80  | 100 | 88  | 92  |
| <b>IDH2</b>            | 84  | 100 | 90  | 99  | 77  | 96  | 96  | 90  | 91  | 86  |
| MPP4                   | 79  | 86  | 100 | 82  | 100 | 87  | 100 | 92  | 100 | 100 |
| HNF1A                  | 77  | 87  | 100 | 90  | 93  | 100 | 100 | 91  | 92  | 100 |
| <b>SRSF2</b>           | 72  | 100 | 87  | 100 | 86  | NA  | NA  | 100 | 90  | 98  |
| SERPINB4               | 71  | 100 | 91  | 84  | 100 | 91  | 100 | 95  | 100 | 94  |
| TGM4                   | 67  | 100 | 78  | 100 | 100 | 101 | 92  | 100 | 95  | 97  |
| <b>BCOR</b>            | 78  | 0   | 0   | 0   | 0   | 0   | 0   | 3   | 0   | 0   |
| USP9X                  | 38  | 0   | 0   | 0   | 0   | 0   | 2   | 0   | 0   | 1   |
| SARS                   | 25  | 100 | 81  | 100 | 84  | 100 | 85  | 100 | 100 | 90  |
| GRIA4                  | 18  | 100 | 100 | 91  | 100 | 88  | 99  | 100 | 83  | 82  |
| DRD5                   | 16  | 87  | 91  | 65  | 67  | 100 | 79  | 85  | 100 | 100 |
| MMP13                  | 12  | 100 | 77  | 90  | 91  | 91  | 81  | 88  | 100 | 93  |
| <b>NRAS</b>            | 6   | 94  | 94  | 98  | 89  | 89  | 74  | 79  | 80  | 100 |
| TGFBR3                 | 4   | 75  | 80  | 84  | 72  | 73  | 54  | 100 | 72  | 95  |
| PROX1                  | 4   | 97  | 91  | 100 | 99  | 100 | 98  | 86  | 93  | 71  |
| TANGO6                 | 4   | 69  | 32  | 57  | 36  | 84  | 57  | 74  | 95  | 65  |
| DNM3                   | 0   | 0   | 0   | 0   | 0   | 0   | 80  | 0   | 1   | 0   |
| NOTCH3                 | 0   | 0   | 0   | 0   | 0   | 0   | 3   | 74  | 0   | 0   |
| DHRS7C                 | 0   | 0   | 0   | 0   | 0   | 0   | 0   | 0   | 41  | 0   |
| ZNF322                 | 0   | 0   | 0   | 0   | 0   | 0   | 0   | 0   | 31  | 0   |
| SMG1                   | 4   | 0   | 0   | 0   | 3   | 1   | 0   | 2   | 1   | 84  |
| <b>LOH(11)(q22-25)</b> | 0   | 0   | 79  | 74  | 0   | 0   | 0   | 0   | 0   | 0   |
| <b>+11(p11-15)</b>     | 0   | 0   | 0   | 0   | 96  | 0   | 0   | 0   | 0   | 0   |
| <b>del(6)(p24-25)</b>  | 0   | 0   | 0   | 0   | 67  | 0   | 0   | 0   | 0   | 0   |
| ORTD4                  | 0   | 0   | 0   | 0   | 54  | 0   | 0   | 0   | 0   | 0   |

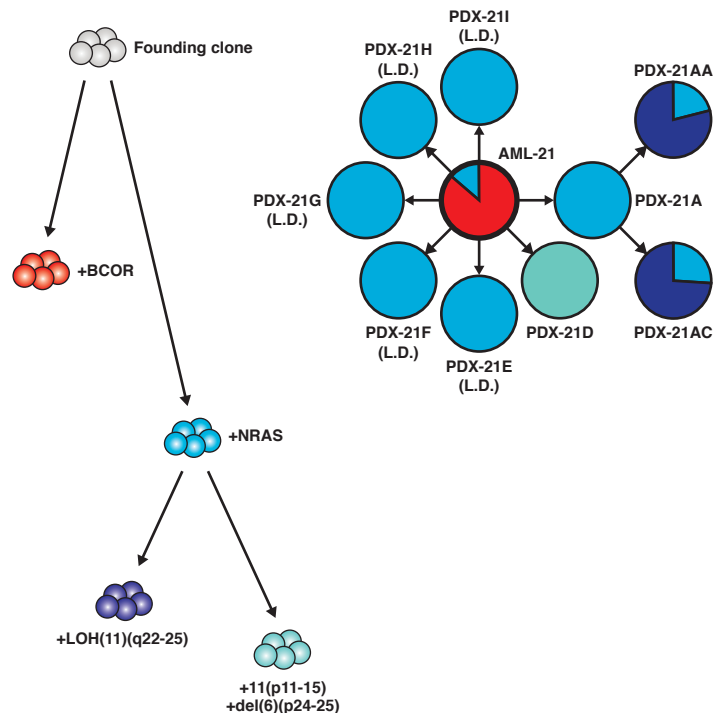

**d****EXPANSION**

|                        |    |     |     |     |
|------------------------|----|-----|-----|-----|
| ANKRD44                | 92 | 96  | 100 | 100 |
| ZNF45                  | 78 | 99  | 75  | 99  |
| AKAP8                  | 75 | 78  | 76  | 94  |
| MIR5684                | 75 | 67  | 94  | 88  |
| LHFPL3                 | 74 | 75  | 100 | 100 |
| XDH                    | 73 | 100 | 77  | 92  |
| TDRD5                  | 65 | 100 | 100 | 95  |
| APLN                   | 64 | 100 | 100 | 97  |
| <b>IDH1</b>            | 62 | 66  | 91  | 83  |
| ACE                    | 62 | 100 | 100 | 100 |
| TJP1                   | 61 | 83  | 100 | 94  |
| SSPO                   | 59 | 68  | 87  | 59  |
| COL6A3                 | 56 | 82  | 100 | 82  |
| SLC35E3                | 56 | 63  | 92  | 100 |
| KCNH1                  | 54 | 99  | 75  | 81  |
| CRELD2                 | 54 | 100 | 100 | 100 |
| CNTNAP5                | 54 | 98  | 97  | 93  |
| CHD9                   | 53 | 88  | 100 | 90  |
| SCAMP2                 | 53 | 75  | 80  | 100 |
| TUSC3                  | 50 | 100 | 100 | 80  |
| STX11                  | 41 | 0   | 0   | 0   |
| <b>del(12)(p11-13)</b> | 9  | 92  | 100 | 100 |
| DIP2B                  | 8  | 79  | 100 | 86  |
| CTNNA2                 | 5  | 100 | 53  | 100 |
| NUPR1L                 | 2  | 59  | 84  | 78  |
| RPL5                   | 0  | 28  | 92  | 100 |
| SOST                   | 0  | 0   | 62  | 0   |
| ZNF503-AS2             | 0  | 0   | 0   | 88  |

AML-74 PDX-74A PDX-74AA PDX-74AB

Founding clone

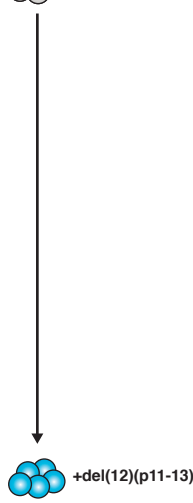**e****EXPANSION**

|                        |    |     |     |     |
|------------------------|----|-----|-----|-----|
| CCDC26                 | 80 | 100 | 99  | 100 |
| <b>TP53</b>            | 76 | 100 | 95  | 97  |
| DNTTIP1                | 67 | 100 | 97  | 89  |
| IL12A-AS1              | 66 | 100 | 100 | 95  |
| SPR                    | 66 | 100 | 100 | 100 |
| SLC25A26               | 63 | 69  | 100 | 86  |
| DRD2                   | 62 | 100 | 95  | 76  |
| SPG20                  | 60 | 88  | 94  | 79  |
| ERBB4                  | 60 | 100 | 94  | 100 |
| <b>i(22)</b>           | 60 | 100 | 98  | 100 |
| <b>i(8)</b>            | 59 | 94  | 90  | 97  |
| SEC61B                 | 58 | 93  | 94  | 85  |
| CRAMP1L                | 58 | 96  | 92  | 90  |
| KIF21A                 | 56 | 97  | 99  | 86  |
| <b>FLT3</b>            | 55 | 101 | 96  | 88  |
| <b>LOH(17)(p12-13)</b> | 51 | 100 | 99  | 96  |
| CNGB1                  | 35 | 89  | 92  | 72  |
| <b>+6</b>              | 17 | 76  | 76  | 100 |
| <b>CDKN2A</b>          | 16 | 71  | 55  | 73  |
| <b>i(18)</b>           | 7  | 49  | 52  | 90  |

AML-37 PDX-37C PDX-37D PDX-37E

Founding clone

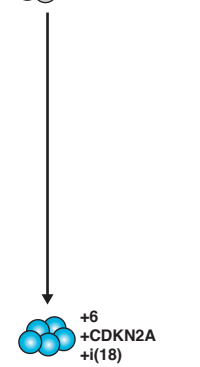**f****EXPANSION**

|                 |    |     |     |     |     |
|-----------------|----|-----|-----|-----|-----|
| SPTBN2          | 98 | 100 | 100 | 100 | 78  |
| MRPL52          | 96 | 100 | 100 | 82  | 100 |
| ANAPC2          | 96 | 100 | 79  | 100 | 73  |
| ZNF644          | 91 | 100 | 100 | 100 | 100 |
| NPHP4           | 90 | 100 | 98  | 100 | 88  |
| ADGRV1          | 90 | 100 | 94  | 100 | 88  |
| BMPR1A          | 89 | 85  | 95  | 94  | 89  |
| EPHA3           | 87 | 97  | 100 | 92  | 100 |
| <b>IDH1</b>     | 87 | 86  | 53  | 100 | 70  |
| PKD1L2          | 87 | 90  | 96  | 100 | 89  |
| C15orf41        | 85 | 62  | 80  | 83  | 100 |
| CLSTN3          | 84 | 75  | 100 | 82  | 100 |
| MGAM            | 80 | 100 | 72  | 95  | 100 |
| TYRO3           | 78 | 100 | 100 | 100 | 100 |
| SLC6A19         | 77 | 94  | 91  | 100 | 84  |
| <b>DNMT3A</b>   | 77 | 95  | 99  | 100 | 100 |
| TTYH1           | 77 | 100 | 98  | 100 | 100 |
| TTN             | 76 | 79  | 19  | 78  | 48  |
| IARS            | 74 | 85  | 93  | 100 | 100 |
| LMAN1           | 52 | 74  | 24  | 78  | 43  |
| <b>NPM1</b>     | 49 | 74  | 34  | 68  | 51  |
| <b>FLT3-ITD</b> | +  | +   | +   | +   | +   |
| <b>LOH(13)</b>  | 35 | 96  | 97  | 96  | 100 |
| ZNF845          | 4  | 1   | 49  | 0   | 35  |
| TFAM            | 0  | 0   | 48  | 0   | 50  |
| PLBD1           | 0  | 3   | 64  | 0   | 14  |
| MAGEA4          | 0  | 0   | 56  | 0   | 24  |

AML-33 PDX-33B PDX-33BA PDX-33C PDX-33CA

Founding clone

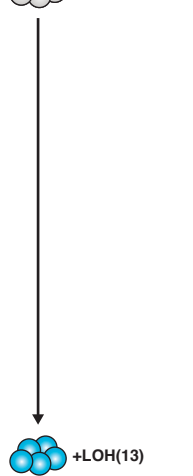

**g**

**EXPANSION**

|                        |     |     |     |     |     |     |
|------------------------|-----|-----|-----|-----|-----|-----|
| MCM4                   | 100 | 100 | 96  | 100 | 81  | 100 |
| CPNE4                  | 100 | 100 | 100 | 91  | 100 | 100 |
| PTPRB                  | 100 | 100 | 100 | 100 | 100 | 99  |
| GOT2                   | 97  | 58  | 53  | 77  | 90  | 100 |
| OSBPL8                 | 97  | 100 | 100 | 97  | 100 | 100 |
| RIMS2                  | 95  | 92  | 100 | 100 | 90  | 94  |
| KIF14                  | 94  | 100 | 85  | 100 | 100 | 95  |
| ITGBL1                 | 92  | 80  | 81  | 100 | 100 | 88  |
| <b>+11(q23-25)</b>     | 92  | 100 | 100 | 100 | 100 | 100 |
| RNF217-AS1             | 91  | 89  | 82  | 100 | 82  | 84  |
| CODC67                 | 89  | 95  | 76  | 65  | 70  | 100 |
| SNORD80                | 88  | 78  | 97  | 100 | 100 | 100 |
| <b>TP53</b>            | 88  | 98  | 100 | 100 | 97  | 100 |
| IMPG2                  | 87  | 86  | 100 | 92  | 100 | 110 |
| <b>NF1</b>             | 87  | 100 | 100 | 97  | 99  | 98  |
| SURF1                  | 86  | 78  | 100 | 100 | 82  | 100 |
| HAL                    | 84  | 93  | 91  | 100 | 99  | 94  |
| MYO6                   | 84  | 100 | 98  | 95  | 99  | 100 |
| SNAP91                 | 83  | 50  | 87  | 100 | 89  | 100 |
| <b>-5q</b>             | 83  | 100 | 100 | 100 | 100 | 100 |
| <b>del(10)(p13-15)</b> | 83  | 100 | 100 | 100 | 100 | 100 |
| <b>del(20)(q12-13)</b> | 83  | 100 | 100 | 100 | 100 | 100 |
| <b>-16p</b>            | 83  | 100 | 100 | 100 | 100 | 100 |
| ERBB3                  | 82  | 100 | 100 | 92  | 99  | 100 |
| <b>LOH(17)</b>         | 82  | 100 | 100 | 100 | 100 | 100 |
| PRPF8                  | 82  | 97  | 100 | 95  | 100 | 98  |
| UNC5A                  | 81  | 100 | 100 | 100 | 100 | 100 |
| CLTCL1                 | 80  | 98  | 97  | 83  | 85  | 100 |
| <b>TET2</b>            | 80  | 75  | 92  | 78  | 76  | 87  |
| <b>del(9)(p23-q22)</b> | 79  | 100 | 100 | 100 | 100 | 100 |
| FBN2                   | 79  | 98  | 97  | 100 | 100 | 99  |
| SEP15                  | 79  | 100 | 100 | 100 | 100 | 100 |
| <b>-7q</b>             | 78  | 96  | 95  | 96  | 97  | 95  |
| C19orf80               | 77  | 65  | 100 | 83  | 100 | 100 |
| PPFIA2                 | 76  | 97  | 100 | 100 | 100 | 100 |
| DSG1                   | 76  | 100 | 100 | 93  | 91  | 100 |
| MIA-RAB4B              | 75  | 95  | 80  | 88  | 96  | 94  |
| SPATA5                 | 74  | 84  | 99  | 65  | 100 | 98  |
| APOB                   | 73  | 77  | 87  | 100 | 85  | 84  |
| FGF20                  | 66  | 99  | 94  | 99  | 90  | 100 |
| <b>del(10)(p11-12)</b> | 64  | 100 | 100 | 100 | 100 | 100 |
| FAM208B                | 63  | 100 | 100 | 100 | 100 | 98  |
| ARHGEF33               | 63  | 65  | 100 | 81  | 79  | 68  |
| ERBB2IP                | 58  | 85  | 86  | 90  | 76  | 89  |
| SULT1B1                | 50  | 61  | 100 | 100 | 90  | 100 |
| C2orf71                | 50  | 80  | 92  | 60  | 74  | 57  |
| A1CF                   | 79  | 0   | 55  | 0   | 0   | 72  |
| HTN1                   | 1   | 0   | 21  | 0   | 0   | 52  |
| MVK                    | 0   | 0   | 12  | 0   | 0   | 65  |
| <b>del(13)(q13-31)</b> | 0   | 0   | 0   | 0   | 0   | 41  |
| <b>del(14)(q12-31)</b> | 0   | 0   | 0   | 0   | 0   | 39  |
| <b>del(10)(q11-21)</b> | 17  | 73  | 65  | 97  | 98  | 32  |
| CTNBN1                 | 33  | 99  | 39  | 0   | 0   | 23  |
| FMN2                   | 25  | 79  | 30  | 0   | 3   | 22  |
| NFATC4                 | 18  | 100 | 51  | 0   | 0   | 22  |
| GNAI2                  | 7   | 83  | 19  | 0   | 0   | 11  |
| MYH1                   | 5   | 92  | 12  | 0   | 0   | 19  |
| ZNF385D                | 4   | 100 | 16  | 3   | 4   | 27  |
| DSP                    | 3   | 100 | 30  | 0   | 0   | 13  |
| CDH6                   | 3   | 89  | 58  | 4   | 0   | 14  |
| PLCE1                  | 0   | 29  | 0   | 0   | 1   | 0   |
| WDR33                  | 31  | 0   | 65  | 100 | 98  | 25  |
| CHD4                   | 10  | 0   | 41  | 93  | 80  | 14  |
| KIF5B                  | 5   | 0   | 47  | 78  | 96  | 18  |
| HJURP                  | 2   | 0   | 73  | 30  | 90  | 6   |
| LOC644145              | 0   | 0   | 66  | 54  | 100 | 0   |
| NDUFS5                 | 0   | 0   | 3   | 65  | 5   | 0   |
| <b>del(10)(q21-23)</b> | 0   | 86  | 0   | 0   | 0   | 0   |
| PSIP1                  | 0   | 22  | 0   | 0   | 0   | 0   |

AML-83 PDX-83A PDX-83B PDX-83BA PDX-83BC PDX-83C

Founding clone

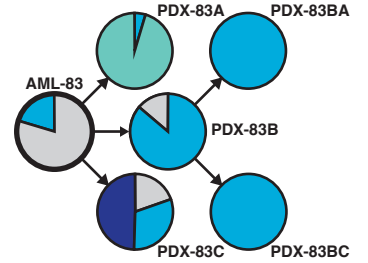

+del(13)(q13-31)

+del(10)(q11-21)

+del(10)(q21-23)

**h**

**EXPANSION**

|                       |    |     |     |
|-----------------------|----|-----|-----|
| SCAF8                 | 51 | 100 | 77  |
| NECAB1                | 49 | 83  | 100 |
| ADCY2                 | 49 | 100 | 100 |
| <b>del(7)(q33-35)</b> | 45 | 100 | 100 |
| <b>-5q</b>            | 42 | 100 | 100 |
| <b>+11(q22-25)</b>    | 42 | 100 | 100 |
| <b>-17(p12-13)</b>    | 41 | 100 | 100 |
| ODF2                  | 38 | 82  | 96  |
| <b>TP53</b>           | 37 | 96  | 94  |
| <b>-12(p12-13)</b>    | 37 | 100 | 100 |
| BPIFB2                | 37 | 71  | 96  |
| ZCCHC12               | 36 | 79  | 88  |
| NAPB                  | 34 | 100 | 77  |
| TBX22                 | 30 | 70  | 82  |
| SALL3                 | 27 | 100 | 100 |
| DIAPH3                | 25 | 100 | 100 |
| <b>-15q</b>           | 21 | 100 | 100 |
| TYR                   | 30 | 1   | 1   |
| PHF3                  | 10 | 96  | 73  |
| <b>CBL</b>            | 7  | 100 | 100 |
| CTSS                  | 1  | 100 | 88  |
| <b>-19(p12-q13)</b>   | 0  | 100 | 100 |
| PCDH17                | 0  | 98  | 37  |
| SLC24A1               | 0  | 75  | 39  |
| TPTE                  | 1  | 31  | 28  |

AML-107 PDX-107A PDX-107AA

Founding clone

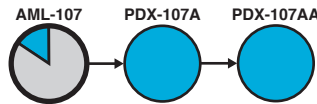

+CBL  
-19(p12-q13)

**i**

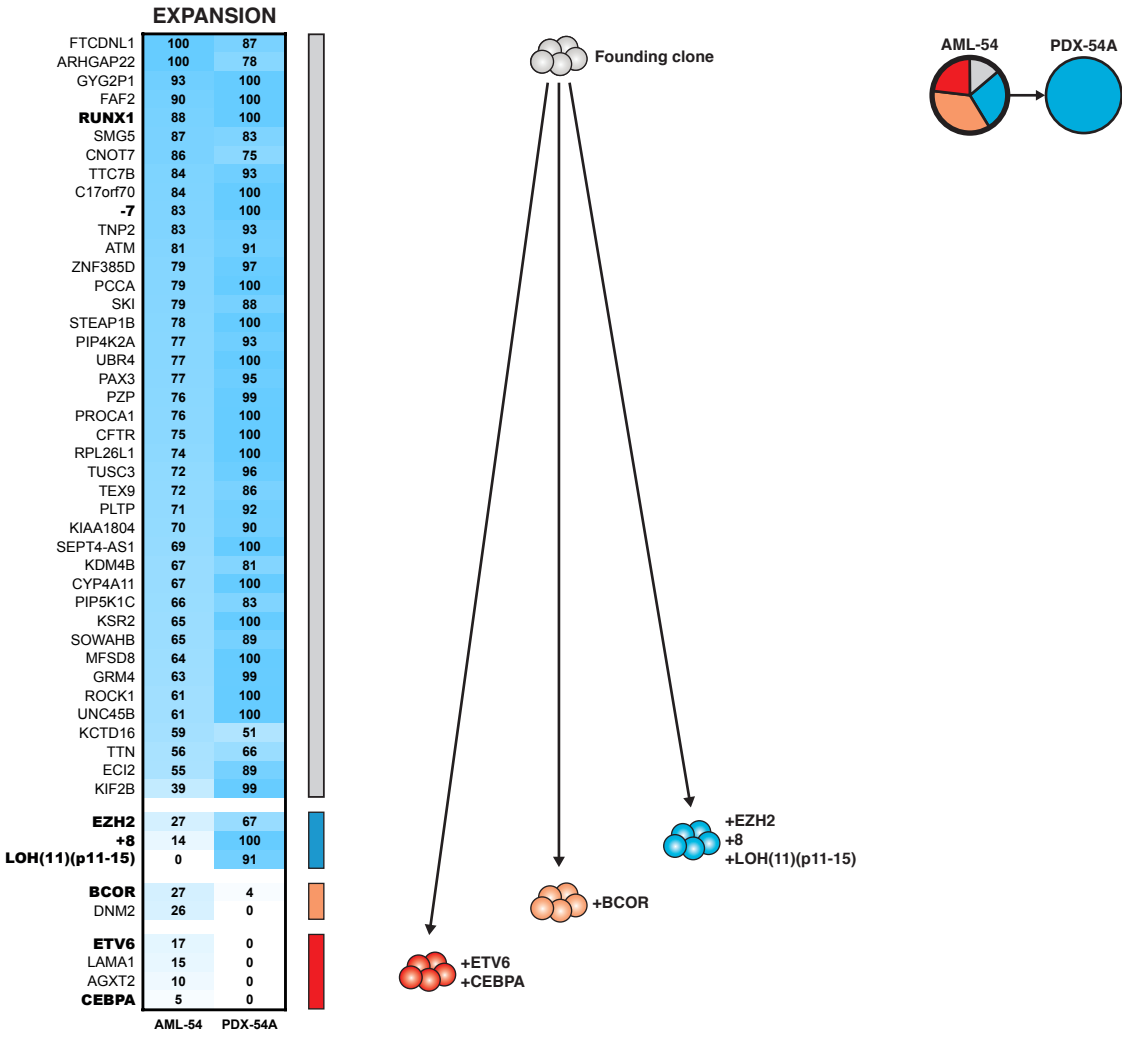

**j**

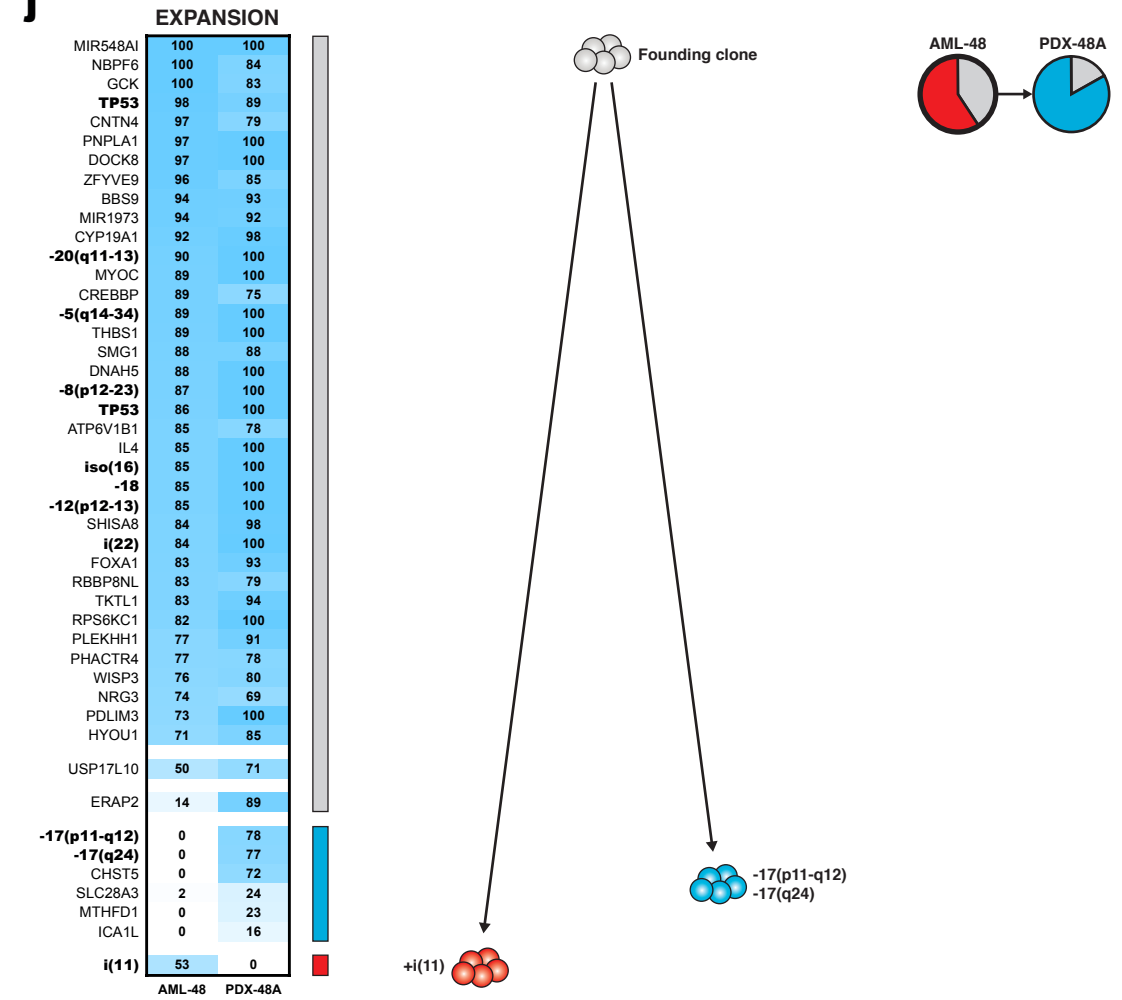

**Supplementary Figure 3. Additional xenografts with the Expansion pattern. (a-j) Ten additional cases with the Expansion pattern of clonal dynamics.**



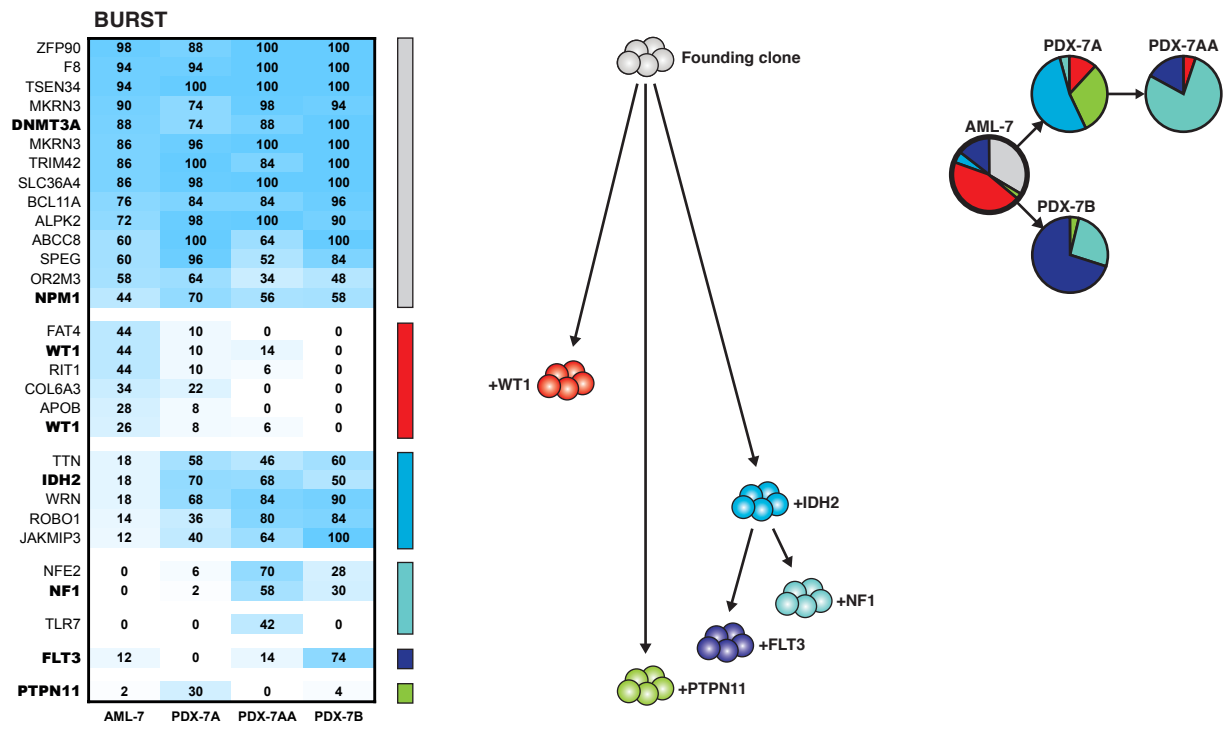

**Supplementary Figure 4. Additional xenografts with the Burst pattern.** One additional case with the Burst pattern of clonal dynamics.

**a**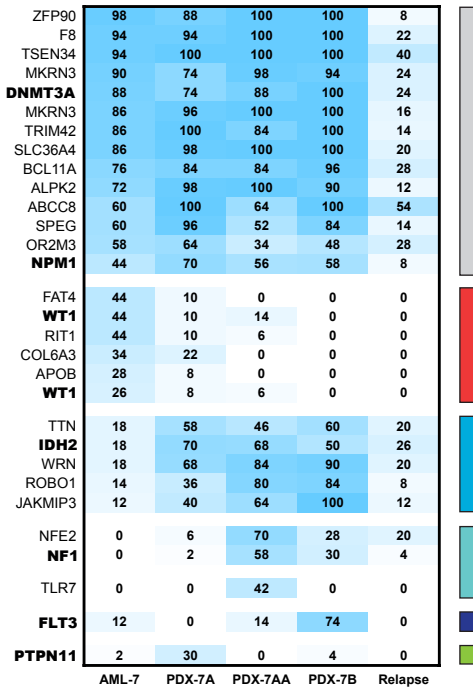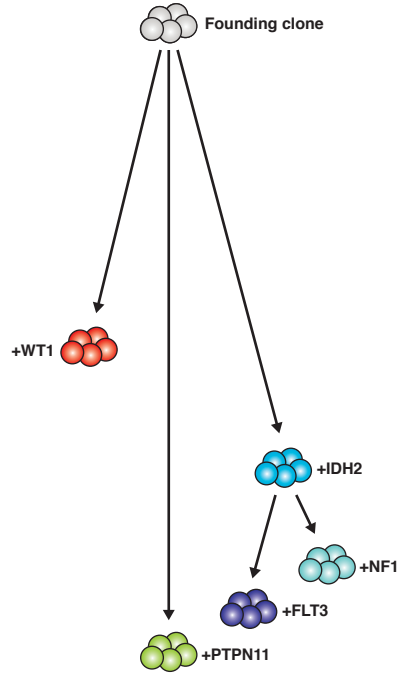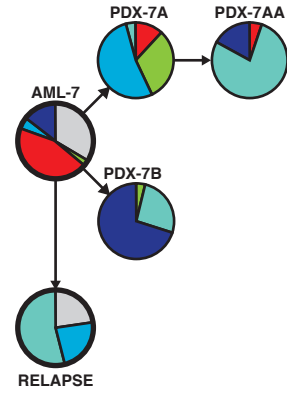**b**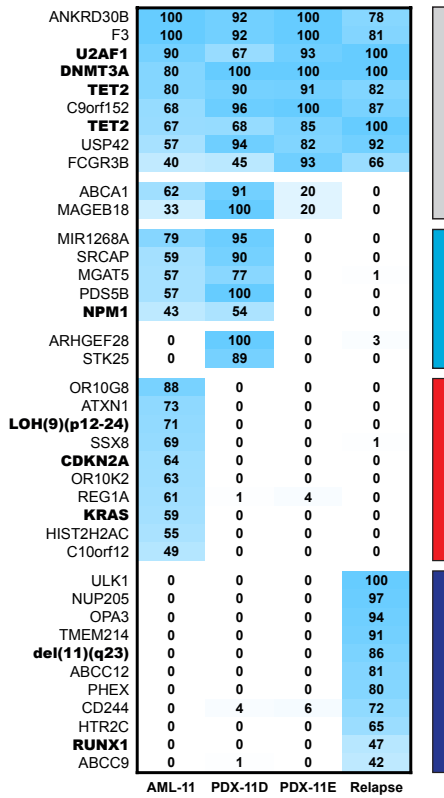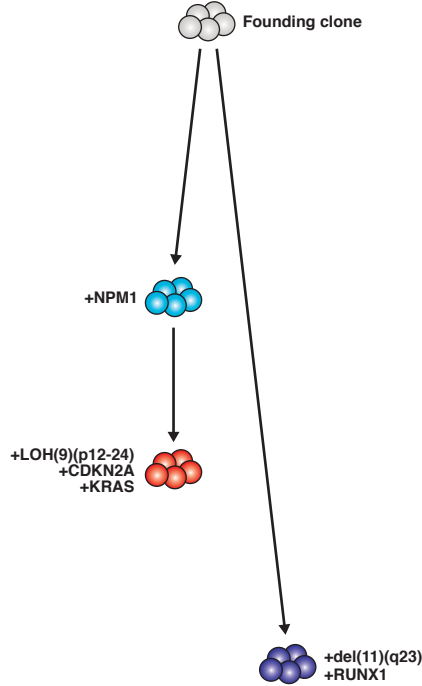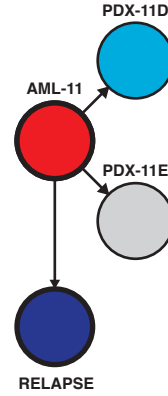**c**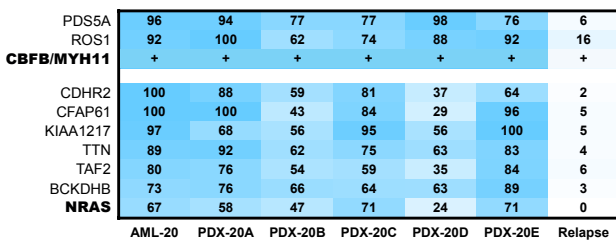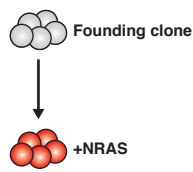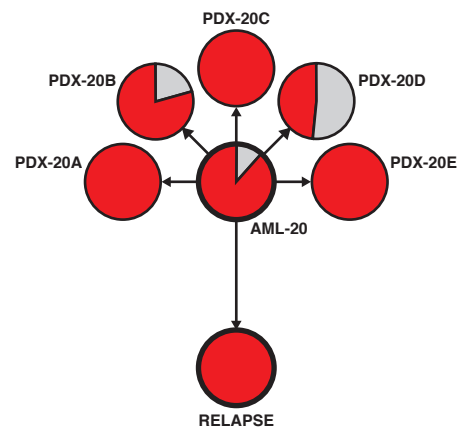

**d**

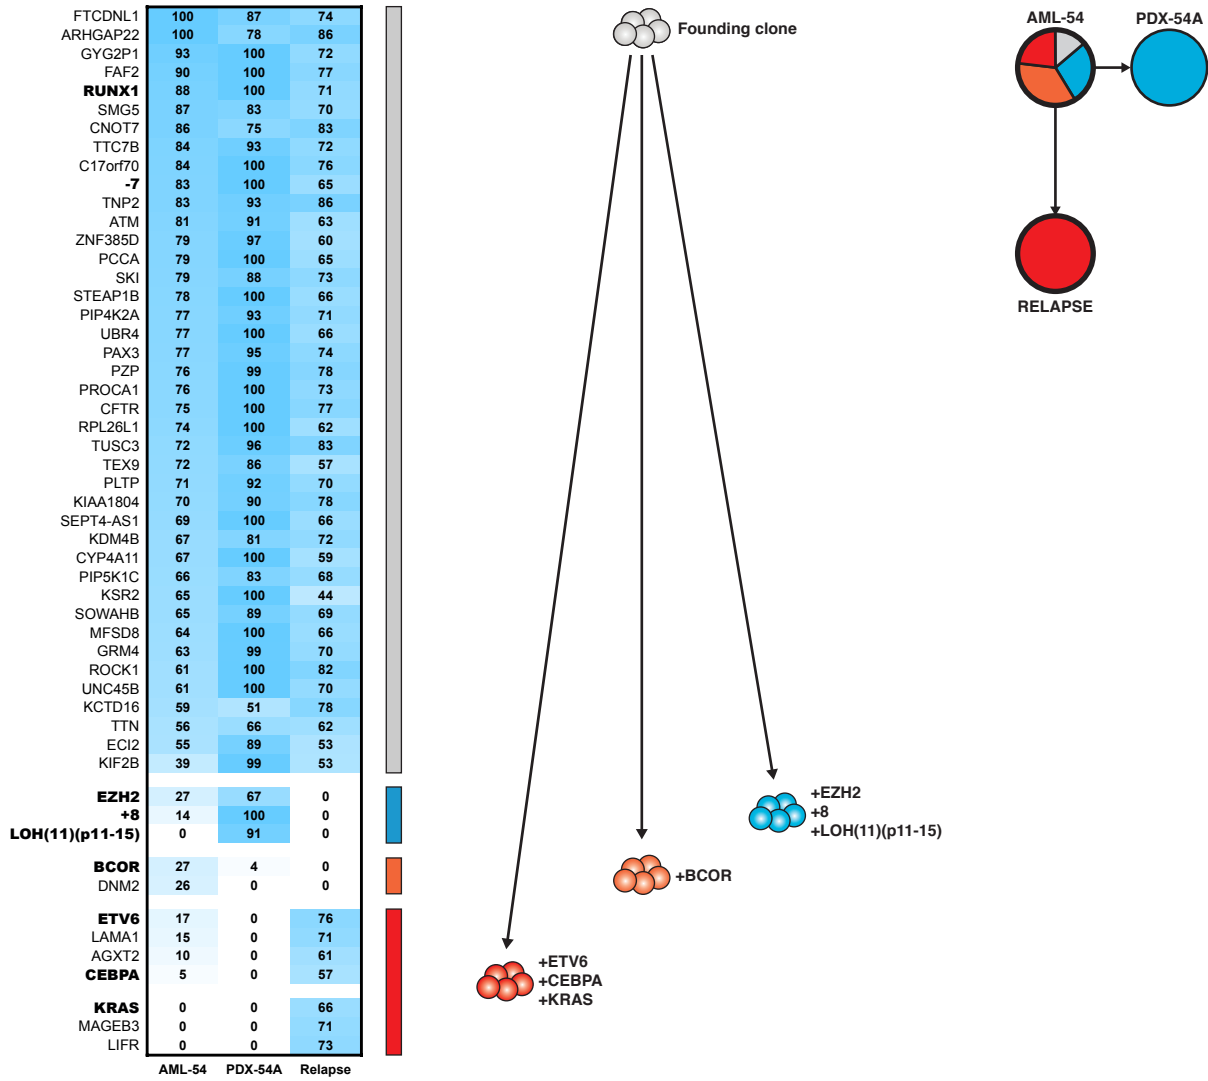

**e**

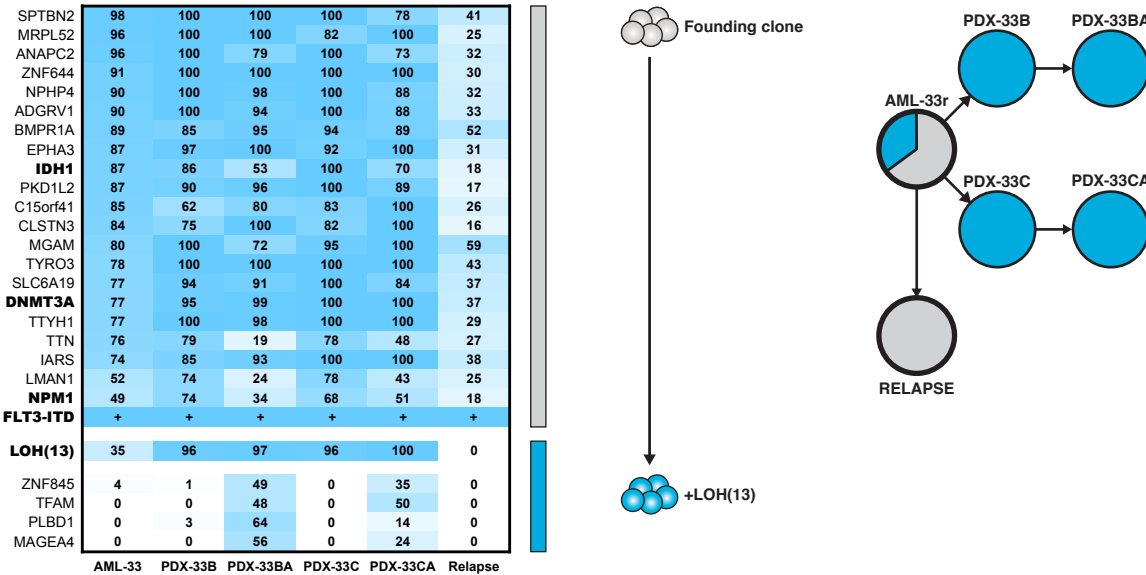

f

|               |    |     |     |    |
|---------------|----|-----|-----|----|
| PRKCG         | 78 | 71  | 81  | 78 |
| FARS2         | 73 | 75  | 95  | 59 |
| NUDT6         | 70 | 87  | 84  | 75 |
| TMEM35        | 69 | 90  | 97  | 75 |
| <b>DNMT3A</b> | 69 | 98  | 100 | 81 |
| <b>TET2</b>   | 69 | 95  | 100 | 74 |
| MAPK11        | 67 | 100 | 100 | 73 |
| FBN2          | 67 | 100 | 100 | 77 |
| ENPP3         | 67 | 85  | 92  | 76 |
| PCDHGB1       | 65 | 97  | 99  | 73 |
| ECHDC1        | 64 | 93  | 95  | 74 |
| OR5K2         | 60 | 100 | 91  | 68 |
| ANK2          | 59 | 84  | 96  | 63 |
| APC           | 57 | 100 | 100 | 80 |
| CACNA1B       | 57 | 99  | 84  | 73 |
| <b>TET2</b>   | 55 | 89  | 97  | 58 |
| DVL1          | 53 | 100 | 74  | 62 |
| CCBL2         | 43 | 71  | 94  | 65 |
| GALNT6        | 35 | 100 | 98  | 69 |
| <b>NPM1</b>   | 32 | 87  | 84  | 44 |
| GPR55         | 32 | 94  | 91  | 74 |
| ANKRD20A4     | 27 | 87  | 81  | 34 |
| KMT2C         | 2  | 56  | 24  | 8  |
| FAM72C        | 1  | 39  | 42  | 14 |
| PLEKHG4B      | 0  | 0   | 0   | 89 |
| GSAP          | 0  | 0   | 0   | 68 |
| PLEC          | 0  | 0   | 0   | 62 |

 Founding clone
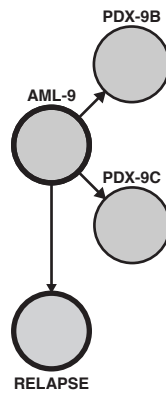

g

|                 |     |     |     |     |    |
|-----------------|-----|-----|-----|-----|----|
| ZIC2            | 100 | 100 | 96  | 100 | 44 |
| ITIH3           | 97  | 96  | 100 | 94  | 15 |
| GADL1           | 97  | 98  | 100 | 86  | 40 |
| IL31RA          | 97  | 100 | 100 | 100 | 24 |
| AGXT            | 96  | 82  | 100 | 73  | 38 |
| CCDC54          | 96  | 100 | 100 | 100 | 31 |
| DSCAML1         | 93  | 84  | 91  | 66  | 36 |
| CCDC168         | 90  | 100 | 88  | 100 | 36 |
| ENTPD4          | 89  | 78  | 100 | 96  | 40 |
| <b>IDH2</b>     | 89  | 75  | 91  | 82  | 36 |
| RYR2            | 88  | 88  | 100 | 100 | 42 |
| ESPNL           | 87  | 88  | 85  | 74  | 26 |
| IRF5            | 86  | 99  | 100 | 46  | 33 |
| SORCS2          | 85  | 83  | 92  | 82  | 33 |
| KRT39           | 84  | 90  | 84  | 71  | 32 |
| NPAP1           | 83  | 91  | 91  | 74  | 35 |
| OR4B1           | 80  | 83  | 94  | 58  | 34 |
| TGS1            | 78  | 94  | 86  | 76  | 19 |
| XDH             | 77  | 86  | 80  | 85  | 30 |
| MYO5C           | 75  | 100 | 100 | 77  | 25 |
| <b>NPM1</b>     | 74  | 83  | 62  | 85  | 18 |
| SLC6A1          | 71  | 71  | 84  | 74  | 27 |
| COL15A1         | 67  | 86  | 98  | 100 | 25 |
| SIGLEC1         | 64  | 85  | 75  | 100 | 32 |
| C14orf180       | 1   | 0   | 0   | 0   | 29 |
| SNORD116-25     | 0   | 0   | 0   | 0   | 44 |
| ADAM29          | 88  | 85  | 100 | 78  | 1  |
| WASH2P          | 83  | 82  | 82  | 71  | 0  |
| NHEJ1           | 74  | 91  | 89  | 69  | 0  |
| <b>FLT3-ITD</b> | 68  | 72  | 86  | 84  | 0  |

 Founding clone
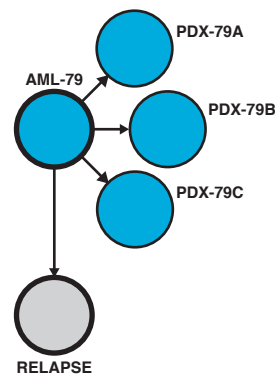
 +FLT3-ITD

**Supplementary Figure 5. AML Xenografts can reveal relapse clones but not predict clonal evolution from diagnosis to relapse.** AML xenografts identified the relapsing clone in the diagnostic sample from AML-7 (a) and partially recapitulated the clonal dynamics from diagnosis to relapse in AML-11 (b) but did not predict the evolution from diagnosis to relapse in AML-20 (c), AML-54 (d), AML-33 (e) and AML-79 (g). AML-9 (f) contained the same clone at diagnosis and relapse. The presence of FLT3-ITD in AML-33 and corresponding xenografts is denoted by "+", as the rearrangement in this case is detectable but not quantifiable by WES.

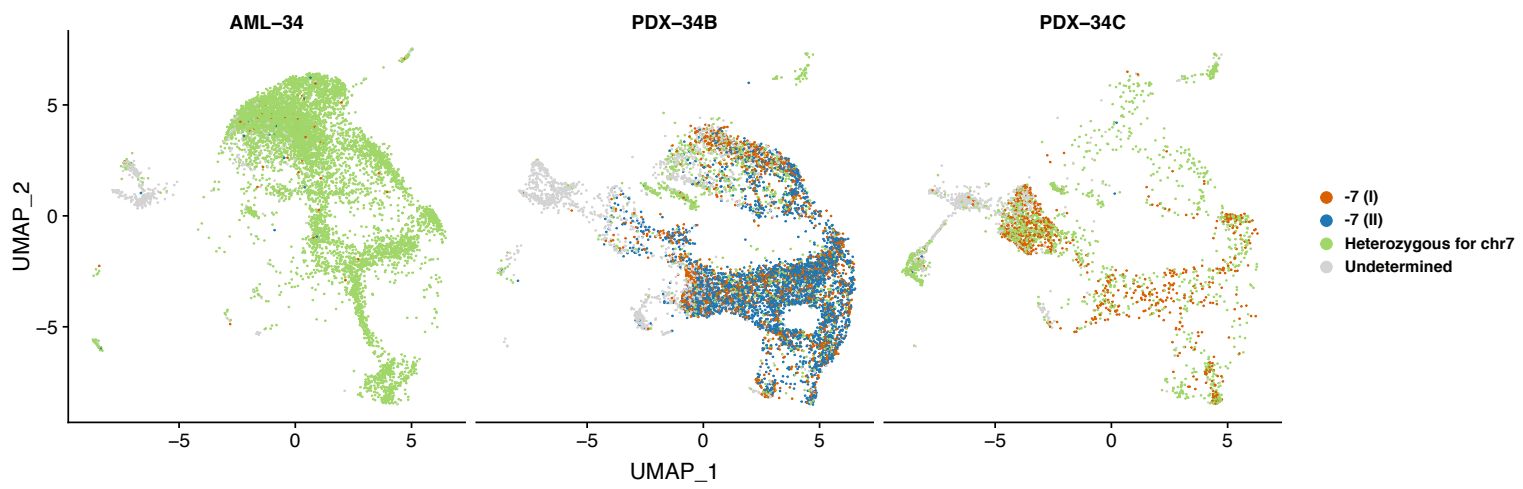

**Supplementary Figure 6. Validation of clonal dynamics by single cell sequencing.** Identification of monosomy 7 by single cell RNA sequencing through detection of SNVs in expressed transcripts from chromosome 7, confirming the expansion of clones with losses of either allele of chromosome 7 in two independent xenografts.

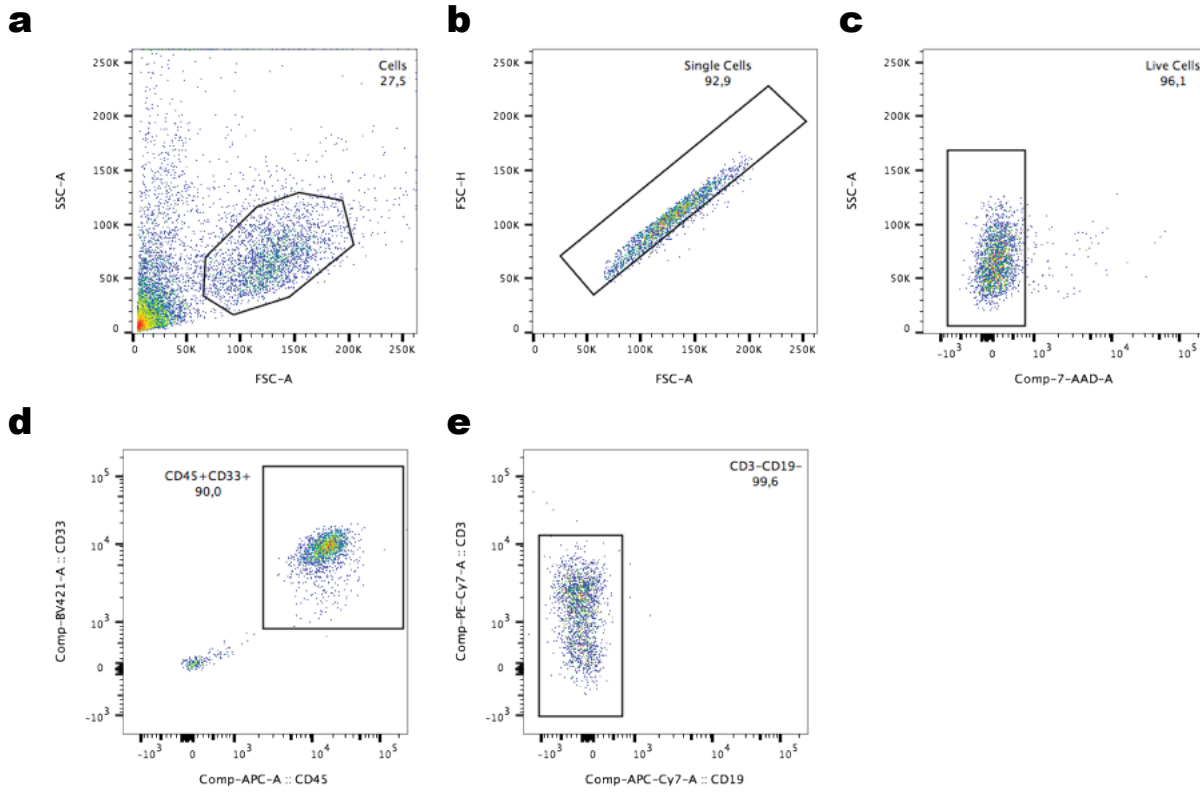

**Supplementary Figure 7. Gating strategy for flow cytometry.** Leukemic engraftment was assessed as the percentage of hCD45+CD33+CD3-CD19- cells within the live cell compartment through sequential gating from (a) to (e).

## Supplementary Methods

### Algorithmic clone calling

Manual clone calling was validated by clone calling using the PyClone software.<sup>1</sup> The PyClone results confirmed the original clone calling, except in three instances where the algorithm produced less credible clonal structures, thus validating the manual approach. First, in four samples with insertions in *NPM1* (AML-7, AML16, AML-26 and AML-28), PyClone separated the *NPM1* alteration from the other founding clone mutations due to well-known systematic underestimation of insertions and deletions in sequencing data. Second, PyClone failed to separate the *NRAS* (G12V) mutation from the founding clone mutations in AML-34, despite the mutation being present in virtually all cells in eight of the nine samples but completely absent from the xenograft which instead carried the *NRAS* (G12S) mutation. Third, in AML-7, PyClone combined the *PTPN11* and *WT1* mutations into a single clone despite the presence of samples containing the *WT1* mutation but not the *PTPN11* mutation and vice versa. The same was done for the *NF1* and *FLT3* clones, which were anticorrelated, with PDX-7AA containing the *FLT3* clone at 14% and the *NF1* clone at 64% but PDX-7B containing the *FLT3* clone at 74% and the *NF1* clone at 29%.

## Supplementary References

- 1 Roth, A. *et al.* PyClone: statistical inference of clonal population structure in cancer. *Nature methods* **11**, 396-398, doi:10.1038/nmeth.2883 (2014).
